# Supplementary material for: Informative missingness in electronic health record systems: the curse of knowing
Source: Diagn Progn Res. 2020 Jul 2;4:8. doi: 10.1186/s41512-020-00077-0 (PMC7371469; doi:10.1186/s41512-020-00077-0)
Supplement: Supplementary file 1 — Additional file 1. R code. [file 41512_2020_77_MOESM1_ESM.r]

# ========================================================================
# R code to generate and analyze datasets under different missing data mechanisms.
# These example data are intended as illustrations of how the transportability of 
# a prediction model depends on the missing data mechanism
# ========================================================================
# OUTLINE:
# 1. Binary outcome depends on 2 predictors; 1 observed (P), 1 unobserved (U)
# 2. Probability of predictor P being measured depends on values of P and U
# 3. Prediction model is created using 4 different methods:
#	(i) use all data, where missing values are imputed by a zero;
#	(ii) use all data, where missing values are imputed by the mean observed value;
#	(iii) use observed data only (complete case analysis);
#	(iv) apply mutliple imputation first, then analyse imputed data;
# 4. The prediction model is applied in 4 different scenarios: 
#	(i) same missing data pattern; 
#	(ii) predictor P measured  in all
#	(iii) predictor P measured in random 50%
#	(iv) predictor P measured  in no-one
# 5. Performance of prediction model quantified using root mean squared prediction error (RMSE) and c-statistic
# ========================================================================

# setwd("directory") # set working directory

# ========================================================================
# install.packages("mice")
library(mice)

# ========================================================================
# useful functions:

expit <- function(x) 1/(1+exp(-x))

logit <- function(x) log(x/(1-x))

c.stat <- function(x,y){
	x1 <- x[y==0]
	x2 <- x[y==1]
	cstat <- wilcox.test(x2,x1)$statistic/(length(x1)*length(x2))
	return(cstat)
	}

brier <- function(x,y) mean((y - x)^2)

CIL <- function(pred.risk, Y){
	logit.pred.risk <- log(pred.risk/(1-pred.risk))
	a <- glm(Y~ 1 + offset(logit.pred.risk), family=binomial)$coef[1]
	return(a)
	}
	
result <- function(pred.risk, risk, Y){
	P.err 	<- pred.risk - risk
	mean.P.err 	<- mean(P.err)
	sd.P.err 	<- sd(P.err)
	RMSPE		<- sqrt(mean(P.err^2))
	cstat 	<- c.stat(pred.risk, Y)
	Brier 	<- brier(pred.risk, Y)
	cil		<- CIL(pred.risk,Y)
	out 		<- c(mean.P.err, sd.P.err, RMSPE, cstat, Brier, cil)
	return(out)
	}

plotfun1 <- function(X,Y, JIT, N, MAIN){
	samp <- sample(1:length(X),N,replace=FALSE)
	plot(jitter(X[samp],amount=JIT),Y[samp], col="grey", pch=19, cex=.5, 
		main=paste(MAIN),
		xlab="predicted risk", 
		ylab="true probability of event",
		xaxt='n', yaxt='n',
		ylim=c(0,1),xlim=c(0,1), las=1)
	axis(side=1,at=seq(0,1,length.out=6),labels=c(0,"","","","",1))
	axis(side=2,at=seq(0,1,length.out=6),labels=c(0,"","","","",1),las=1)
	abline(0,1,lwd=1,col=1, lty=2)
	}


# ========================================================================
# generate data to be used to develop prediction model:
# ========================================================================

set.seed(2505)
n 	<- 2e4
U 	<- runif(n)
P 	<- runif(n)
LP.r	<- 3 - 2*P - 2*U - 4*P*U		# missing data generating mechanism
R 	<- rbinom(n,1,expit(LP.r))		# missingness indicator (R=1: missng; R=0: not missing)
LP.y 	<- -5 + 3*P + 5*U 			# outcome generating mechanism
Y 	<- rbinom(n,1,expit(LP.y))		# outcome 


# ========================================================================
# development of prediction model:
# ========================================================================

# 00. reference, fully observed data:
fit.00	<- glm(Y~P, family=binomial)

# 01. analysis where missing predictor values are set to zero and missing indicator is added to the model:
P.na.0	<- P; 
P.na.0[R==1] <- 0		
fit.01	<- glm(Y~P.na.0 + R, family=binomial)

# 02. analysis where missing predictor values are set to mean value and missing indicator is added to the model:
P.na.mean	<- P; 
P.na.mean[R==1] <- mean(P[R==0])		
fit.02	<- glm(Y~P.na.mean + R, family=binomial)

# 03. analysis where subjects with missing predictor values are excluded (complete case analysis):
fit.03	<- glm(Y~P, family=binomial, subset=R==0)		

# 04. first multiple imputation, then analysis:
dat.na 	<- data.frame(P,Y); dat.na$P[R==1] <- NA
dat.imp	<- complete(mice(dat.na,m=1),1)				
fit.04	<- glm(Y~P, data=dat.imp, family=binomial)


# ========================================================================
# generate data used to evaluate model under different missing data scenarios:
# ========================================================================

n 		<- 2e4
U.nw 		<- runif(n)
P.nw 		<- runif(n)
LP.r.nw	<- 3 - 2*P.nw - 2*U.nw - 4*P.nw*U.nw	# missing data generating mechanism
R.nw 		<- rbinom(n,1,expit(LP.r.nw))			# missingness indicator (R=1: missng; R=0: not missing)
LP.y.nw 	<- -5 + 3*P.nw + 5*U.nw 			# outcome generating mechanism
Y.nw 		<- rbinom(n,1,expit(LP.y.nw))			# outcome 
risk 		<- expit(LP.y.nw)


# ========================================================================
## 0. reference:
# ========================================================================

newdat.0 	<- as.matrix(cbind(rep(1,n),P.nw))
pred.risk.0 <- expit(newdat.0 %*% fit.00$coef)


# ========================================================================
## 1. same missing data mechanmism:
# ========================================================================

# Missing indicator method with missing predictor values set to zero:
P.na.0.nw 	<- P.nw; 
P.na.0.nw[R.nw==1] <- 0		
newdat.11 	<- as.matrix(cbind(rep(1,n),P.na.0.nw, R.nw))
pred.risk.11 <- expit(newdat.11 %*% fit.01$coef)

# Missing indicator method with missing predictor values set to mean value:
P.na.m.nw 	<- P.nw; 
P.na.m.nw[R.nw==1] <- mean(P.nw[R.nw==0])	
newdat.12 	<- as.matrix(cbind(rep(1,n),P.na.m.nw, R.nw))
pred.risk.12 <- expit(newdat.12 %*% fit.02$coef)

# Complete case analysis:
n.obs 	<- sum(R.nw==0)
P.cc 		<- P.nw[R.nw==0]
newdat.13 	<- as.matrix(cbind(rep(1,n.obs),P.cc))
pred.risk.13 <- expit(newdat.13 %*% fit.03$coef)

# Multiple imputation:
P.na.nw 	<- P.nw; 
P.na.nw[R.nw==1] <- NA		
dat.na.nw 	<- data.frame(P.na.nw,Y.nw)
dat.imp.nw 	<- complete(mice(dat.na.nw,m=1),1)				
newdat.14 	<- as.matrix(cbind(rep(1,n),dat.imp.nw$P.na.nw))
pred.risk.14 <- expit(newdat.14 %*% fit.04$coef)


# ========================================================================
## 2. measurements in all
# ========================================================================

# Missing indicator method with missing predictor values set to zero:
newdat.21 	<- as.matrix(cbind(rep(1,n),P.nw, 0))
pred.risk.21 <- expit(newdat.21 %*% fit.01$coef)

# Missing indicator method with missing predictor values set to mean value:
newdat.22 	<- as.matrix(cbind(rep(1,n),P.nw, 0))
pred.risk.22 <- expit(newdat.22 %*% fit.02$coef)

# Complete case analysis:
newdat.23 	<- as.matrix(cbind(rep(1,n),P.nw))
pred.risk.23 <- expit(newdat.23 %*% fit.03$coef)

# Multiple imputation:
newdat.24 	<- as.matrix(cbind(rep(1,n),P.nw))
pred.risk.24 <- expit(newdat.24 %*% fit.04$coef)


# ========================================================================
## 3. measurements in random 50%
# ========================================================================

R.rand 	<- c(rep(1,n/2),rep(0,n/2))

# Missing indicator method with missing predictor values set to zero:
P.na.0.nw 	<- P.nw; 
P.na.0.nw[R.rand==1] <- 0		
newdat.31 	<- as.matrix(cbind(rep(1,n),P.na.0.nw, R.rand))
pred.risk.31 <- expit(newdat.31 %*% fit.01$coef)

# Missing indicator method with missing predictor values set to mean value:
P.na.m.nw 	<- P.nw; 
P.na.m.nw[R.rand==1] <- mean(P.nw[R.rand==0])	
newdat.32 	<- as.matrix(cbind(rep(1,n),P.na.m.nw, R.rand))
pred.risk.32 <- expit(newdat.32 %*% fit.02$coef)

# Complete case analysis:
n.obs 	<- sum(R.rand==0)
P.cc 		<- P.nw[R.rand==0]
newdat.33 	<- as.matrix(cbind(rep(1,n.obs),P.cc))
pred.risk.33 <- expit(newdat.33 %*% fit.03$coef)

# Multiple imputation:
P.na.nw 	<- P.nw; 
P.na.nw[R.rand==1] <- NA		
dat.na.nw 	<- data.frame(P.na.nw,Y.nw)
dat.imp.nw 	<- complete(mice(dat.na.nw,m=1),1)				
newdat.34 	<- as.matrix(cbind(rep(1,n),dat.imp.nw$P.na.nw))
pred.risk.34 <- expit(newdat.34 %*% fit.04$coef)


# ========================================================================
## 4. measurements in no-one:
# ========================================================================

# Missing indicator method with missing predictor values set to zero:
newdat.41 	<- as.matrix(cbind(rep(1,n),rep(0,n),rep(1,n)))
pred.risk.41 <- expit(newdat.41 %*% fit.01$coef)

# Missing indicator method with missing predictor values set to mean value: not applicable
# Complete case analysis: not applicable
# Multiple imputation: not applicable


# ========================================================================
## performance measures:
# ========================================================================

# generate table with (1) mean prediction error (PE), (2) sd of PE, (3) root mean squared PE, 
# (4) c-statistic, (5) Brier score, (6) calibration-in-the-large:
RES	 		<- matrix(ncol=6,nrow=14)
colnames(RES) 	<- c("mean","sd","rmse","c-stat","Brier","CIL")
rownames(RES) 	<- c("ref","m11","m12","m13","m14","m21","m22","m23","m24","m31","m32","m33","m34","m41")
RES["ref",]		<- result(pred.risk.0, risk, Y.nw)
RES["m11",] 	<- result(pred.risk.11, risk, Y.nw)
RES["m12",] 	<- result(pred.risk.12, risk, Y.nw)
RES["m13",] 	<- result(pred.risk.13, risk[R.nw==0], Y.nw[R.nw==0])
RES["m14",] 	<- result(pred.risk.14, risk, Y.nw)
RES["m21",] 	<- result(pred.risk.21, risk, Y.nw)
RES["m22",] 	<- result(pred.risk.22, risk, Y.nw)
RES["m23",] 	<- result(pred.risk.23, risk, Y.nw)
RES["m24",] 	<- result(pred.risk.24, risk, Y.nw)
RES["m31",] 	<- result(pred.risk.31, risk, Y.nw)
RES["m32",] 	<- result(pred.risk.32, risk, Y.nw)
RES["m33",] 	<- result(pred.risk.33, risk[R.rand==0], Y.nw[R.rand==0])
RES["m34",] 	<- result(pred.risk.34, risk, Y.nw)
RES["m41",] 	<- result(pred.risk.41, risk, Y.nw)

round(RES,3)


# ========================================================================
## generate plots:
# ========================================================================

# pdf("Figure.pdf", width=15, height=15)
par(oma=c(2,2,0,2), mar=c(2,2,2,2), mfrow=c(4,3))
plotfun1(pred.risk.11, risk, 0.01, 500, 'Scenario 1')
plotfun1(pred.risk.21, risk, 0.01, 500, 'Scenario 2')
plotfun1(pred.risk.31, risk, 0.01, 500, 'Scenario 3')

plotfun1(pred.risk.12, risk, 0.01, 500, '')
plotfun1(pred.risk.22, risk, 0.01, 500, '')
plotfun1(pred.risk.32, risk, 0.01, 500, '')

plotfun1(pred.risk.13, risk, 0.01, 500, '')
plotfun1(pred.risk.23, risk, 0.01, 500, '')
plotfun1(pred.risk.33, risk, 0.01, 500, '')

plotfun1(pred.risk.14, risk, 0.01, 500, '')
plotfun1(pred.risk.24, risk, 0.01, 500, '')
plotfun1(pred.risk.34, risk, 0.01, 500, '')
mtext("predicted probability of the outcome", side=1, line=0, outer=TRUE, cex=.9)
mtext("true risk of the outcome", side=2, line=.5, outer=TRUE, cex=.9)

mtext("zero imputation", side=4, line=0,at=.875, outer=TRUE, cex=.9)
mtext("mean imputation", side=4, line=0,at=.625, outer=TRUE, cex=.9)
mtext("complete case analysis", side=4, line=0,at=.375, outer=TRUE, cex=.9)
mtext("multiple imputation", side=4, line=0,at=.125, outer=TRUE, cex=.9)

# dev.off()

# ========================================================================
## end of code...
# ========================================================================
